# Supplementary material for: Gibberellin Oxidase Gene Family in L. chinense: Genome-Wide Identification and Gene Expression Analysis
Source: MDPI journal article supplement (doi:10.3390/ijms22137167), 2021-07-02
Supplement: s1 [file s1]

|    | Logo | E-value  | Sites | Width |
|----|------|----------|-------|-------|
| 1  |      | 9.9e-411 | 28    | 41    |
| 2  |      | 2.3e-349 | 27    | 28    |
| 3  |      | 2.6e-339 | 29    | 21    |
| 4  |      | 1.0e-176 | 9     | 38    |
| 5  |      | 3.1e-167 | 27    | 15    |
| 6  |      | 1.1e-185 | 29    | 21    |
| 7  |      | 5.6e-140 | 13    | 29    |
| 8  |      | 1.1e-138 | 27    | 21    |
| 9  |      | 7.5e-110 | 29    | 21    |
| 10 |      | 1.3e-094 | 8     | 28    |
| 11 |      | 2.3e-062 | 28    | 11    |
| 12 |      | 2.7e-054 | 28    | 13    |
| 13 |      | 2.8e-030 | 9     | 21    |
| 14 |      | 2.1e-028 | 8     | 15    |
| 15 |      | 4.2e-028 | 4     | 25    |
