# Supplementary figures and images for: Gibberellin Oxidase Gene Family in L. chinense: Genome-Wide Identification and Gene Expression Analysis
Source: MDPI journal article supplement (doi:10.3390/ijms22137167), 2021-07-02

**GA20**

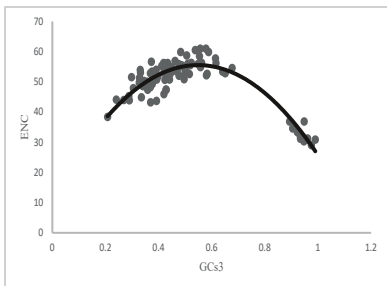

**C19GA2**

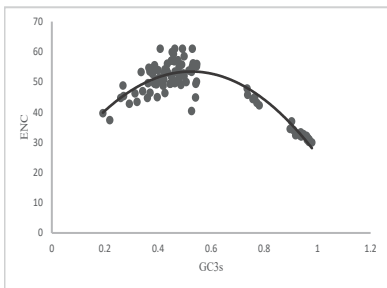

**C20GA2**

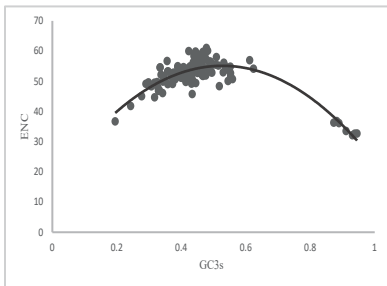

Supplement: s1 [file s1]

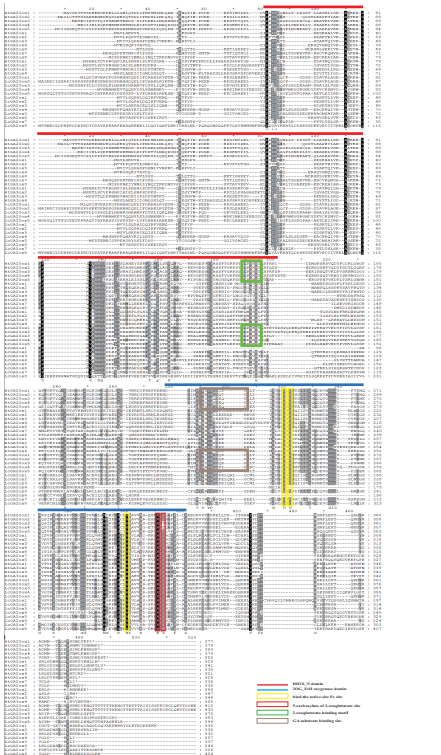

Supplement: s1 [file s1]
